# Supplementary material for: Reversing Mg suppression effect on Co-site water oxidation of MgCo2O4 based on vanadium-atom electronic affinity synergy with Mg sites toward electronic redistribution
Source: Royal Society of Chemistry journal article supplement (doi:10.1039/d3cy01085f), 2023-01-01
Supplement: d3cy01085f1.pdf [file d3cy01085f1.pdf]

**Reversing Mg suppression effect on Co-Site water oxidation of  $\text{MgCo}_2\text{O}_4$   
based on vanadium-atom electronic affinity synergy with Mg sites toward  
electronic redistribution**

Hui Zhang,<sup>a,†</sup> Hui Han,<sup>a,†</sup> Xuan Yang,<sup>a</sup> Hongyu Ma,<sup>a</sup> Zhifei Song<sup>a,b</sup> and Xuqiang Ji<sup>a,\*</sup>

<sup>a</sup> College of Materials Science and Engineering, Institute for Graphene Applied  
Technology Innovation, Qingdao University, Qingdao 266071, China

<sup>b</sup> School of Electromechanic Engineering, Qingdao University, Qingdao 266071,  
China

\*Corresponding Author, E-mail: xuqianglucky@163.com.

† These workers contribute equally to this paper.

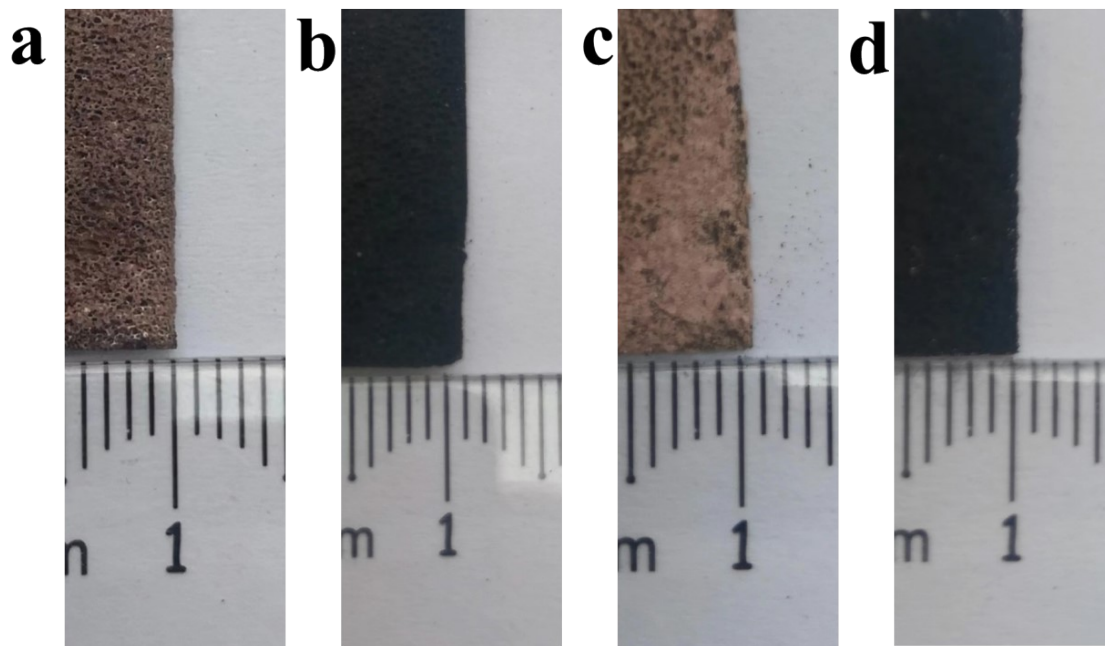

**Fig. S1** The optical images of (a) V-CoOOH@MgCO<sub>3</sub>, (b) V-MgCo<sub>2</sub>O<sub>4</sub>@MgO, (c) CoOOH@MgCO<sub>3</sub> (d) MgCo<sub>2</sub>O<sub>4</sub>@MgO.

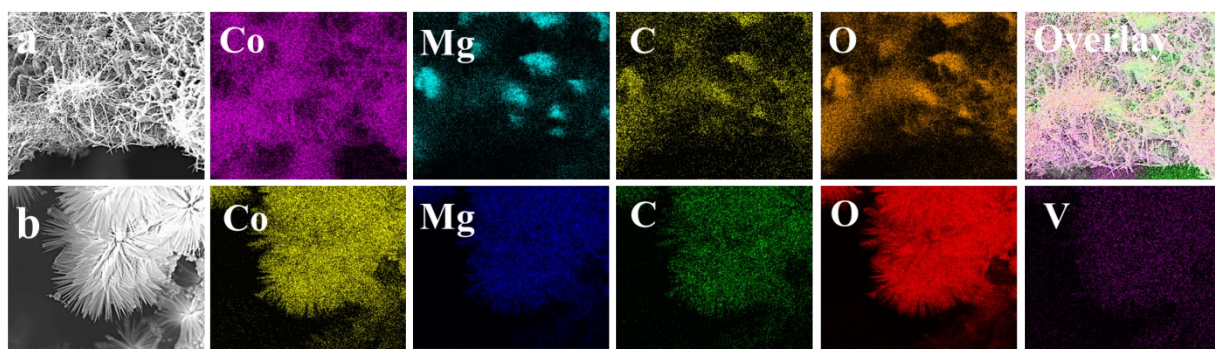

**Fig. S2** The SEM images of (a) MgCo<sub>2</sub>O<sub>4</sub>@MgO (b) V-CoOOH@MgCO<sub>3</sub> and their corresponding EDX element mapping images.

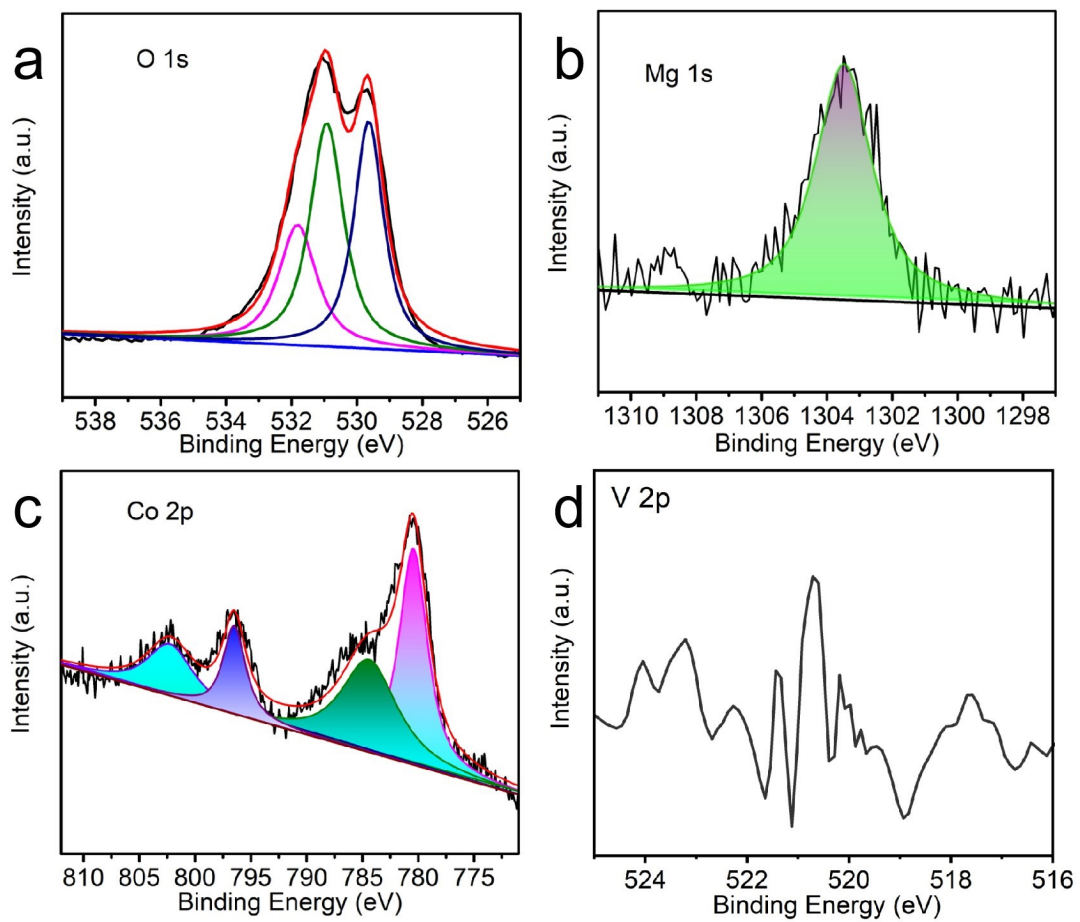

**Fig. S3** XPS spectra of (a) O 1s, (b) Mg 1s, (c) Co 2p, (d) V 2p for MgCo<sub>2</sub>O<sub>4</sub>@MgO.

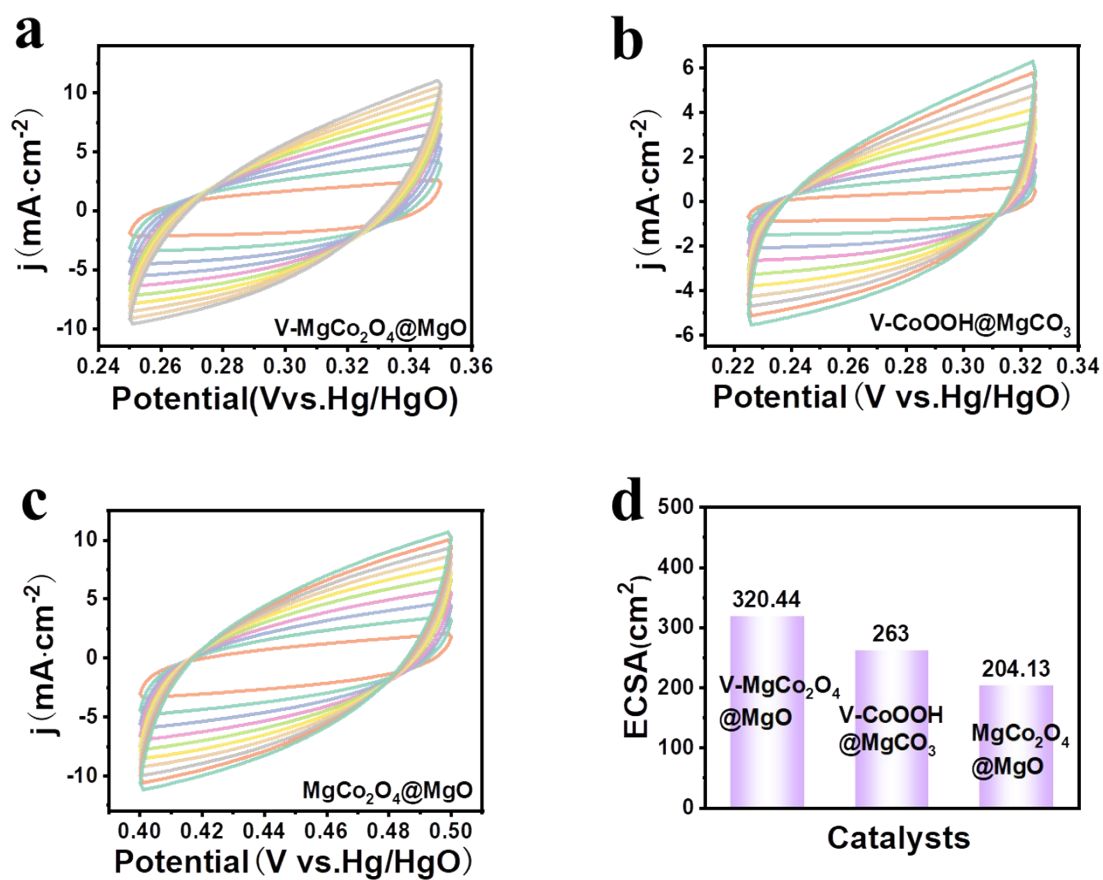

**Fig. S4** CVs for (a) V-MgCo<sub>2</sub>O<sub>4</sub>@MgO, (b) V-CoOOH@MgCO<sub>3</sub>, (c) MgCo<sub>2</sub>O<sub>4</sub>@MgO at scan rates from 10 to 100 mV·s<sup>-1</sup> in 1.0 M KOH. (d) ECSA values of V-MgCo<sub>2</sub>O<sub>4</sub>@MgO, V-CoOOH@MgCO<sub>3</sub> and MgCo<sub>2</sub>O<sub>4</sub>@MgO.

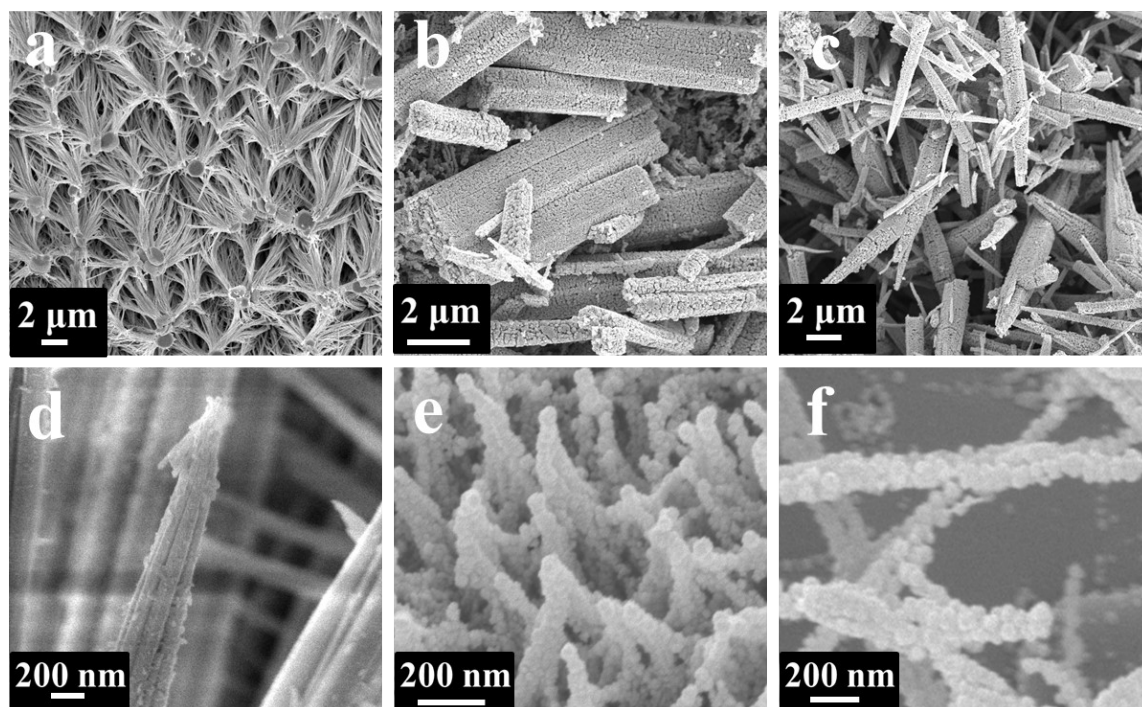

**Fig. S5** The SEM images of (a and d) V-CoOOH@MgCO<sub>3</sub>, (b and e) V-MgCo<sub>2</sub>O<sub>4</sub>@MgO and (c and f) MgCo<sub>2</sub>O<sub>4</sub>@MgO after electrolysis for 24 hours at different magnifications.

**Table S1.** Comparison of OER performances for V-MgCo<sub>2</sub>O<sub>4</sub>@MgO with other electrocatalysts recently reported in 1.0 M KOH.

| Catalyst                                                   | $\eta@100\text{mA cm}^{-2}$<br>(mV) | Ref.                                                                      |
|------------------------------------------------------------|-------------------------------------|---------------------------------------------------------------------------|
| V-MgCo <sub>2</sub> O <sub>4</sub> @MgO                    | 240                                 | This work                                                                 |
| Ni <sub>5</sub> P <sub>4</sub> /NiP <sub>2</sub> /NiFe LDH | 243                                 | <i>J. Mater. Chem. A</i> <b>2018</b> , <i>6</i> , 13619–13623.            |
| Fe(PO <sub>3</sub> ) <sub>2</sub>                          | 221                                 | <i>P NATL A SCI.</i> <b>2017</b> , <i>114</i> , 5607–5611.                |
| CoNiP@LDH                                                  | 249                                 | <i>ACS Appl. Energy Mater.</i> <b>2018</b> , <i>1</i> , 623–631.          |
| CoFe@CoNi                                                  | 262                                 | <i>Chem. Cat. Chem.</i> <b>2022</b> , <i>14</i> , e202200347.             |
| Ni@NiFe LDH                                                | 269                                 | <i>J. Mater. Chem. A</i> <b>2019</b> , <i>7</i> , 21722–21729.            |
| NiFe LDHs                                                  | 280                                 | <i>Adv. Energy Mater.</i> <b>2018</b> , <i>8</i> , 1703341.               |
| NiMoN/NiF                                                  | 294                                 | <i>ACS Appl. Mater. Interfaces</i> <b>2018</b> , <i>10</i> , 30400–30408. |
| CoSe <sub>2</sub> /CoP                                     | 299                                 | <i>Part. Part. Syst. Charact.</i> <b>2018</b> , <i>35</i> , 1800135.      |
| Cu@CoFe LDH                                                | 300                                 | <i>Nano Energy</i> <b>2017</b> , <i>41</i> , 327–336.                     |
| Ni <sub>3</sub> FeN                                        | 300                                 | <i>ACS Catal.</i> <b>2018</b> , <i>8</i> , 9686–9696.                     |
| FeOOH/Co/FeOOH                                             | 309                                 | <i>Angew. Chem.-Int. Edit.</i> <b>2016</b> , <i>55</i> , 3694–3698.       |
| W <sub>0.5</sub> Co <sub>0.4</sub> Fe <sub>0.1</sub> /NF   | 310                                 | <i>Angew. Chem.-Int. Edit.</i> <b>2017</b> , <i>56</i> , 4502–4506.       |
| Oxygenated-CoSe <sub>2</sub> -MoSe <sub>2</sub>            | 310                                 | <i>ACS Catal.</i> <b>2018</b> , <i>8</i> , 4612–4621.                     |
| NiFeCr/NF                                                  | 318                                 | <i>Energy Environ. Sci.</i> <b>2020</b> , <i>13</i> , 4225–4237.          |

|                                                  |     |                                                                         |
|--------------------------------------------------|-----|-------------------------------------------------------------------------|
| $\text{Fe}_{0.09}\text{Co}_{0.13}\text{-NiSe}_2$ | 330 | <i>Adv. Mater.</i> <b>2018</b> , <i>30</i> , 1802121.                   |
| $\text{Ni}_{0.94}\text{Fe}_{0.06}\text{Se}_2$    | 332 | <i>J. Mater. Chem. A</i> <b>2020</b> , <i>8</i> , 8113–8120.            |
| CoFe-PBA                                         | 339 | <i>J. Mater. Chem. A</i> <b>2021</b> , <i>9</i> , 2135–2144.            |
| $\text{Fe}_{0.96}\text{S/Fe(OH)}_3$              | 341 | <i>Appl. Catal. B-Environ.</i> <b>2019</b> , <i>246</i> , 337–348.      |
| CoOOH/Cu                                         | 358 | <i>ACS Sustain. Chem. Eng.</i> <b>2021</b> , <i>9</i> , 12300–12310.    |
| Ni-B/NF                                          | 360 | <i>Nanotechnology</i> <b>2016</b> , <i>27</i> , 12LT01.                 |
| Fe-CoO                                           | 370 | <i>Inorg. Chem. Front.</i> <b>2020</b> , <i>7</i> , 3327–3339.          |
| CoFe(OH) <sub>x</sub>                            | 371 | <i>Catal. Sci. Technol.</i> <b>2020</b> , <i>10</i> , 215–221.          |
| NiMoN-CF                                         | 389 | <i>ChemSusChem</i> <b>2018</b> , <i>11</i> , 3198–3207.                 |
| NiO/Co <sub>3</sub> O <sub>4</sub>               | 394 | <i>ACS Catal.</i> <b>2021</b> , <i>10</i> , 12376–12384.                |
| two-tiered NiSe                                  | 410 | <i>Adv. Energy Mater.</i> <b>2018</b> , <i>8</i> , 1702704.             |
| Ni <sub>3</sub> N                                | 420 | <i>J. Am. Chem. Soc.</i> <b>2015</b> , <i>137</i> , 4119–4125.          |
| NiCoP/C                                          | 430 | <i>Angew. Chem.-Int. Edit.</i> <b>2017</b> , <i>56</i> , 3897–3900.     |
| NiO <sub>x</sub> /Ni                             | 469 | <i>Nanoscale</i> <b>2020</b> , <i>11</i> , 22261–22269.                 |
| Ni <sub>3</sub> FeN/CC                           | 494 | <i>ACS Appl. Mater. Interfaces</i> <b>2018</b> , <i>10</i> , 3699–3706. |



**Table S2.** Comparison of HER performances for V-MgCo<sub>2</sub>O<sub>4</sub>@MgO with other electrocatalysts recently reported in 1.0 M KOH.

| Catalyst                                                   | $\eta@10\text{mA cm}^{-2}$<br>(mV) | Ref.                                                                  |
|------------------------------------------------------------|------------------------------------|-----------------------------------------------------------------------|
| V-MgCo <sub>2</sub> O <sub>4</sub> @MgO                    | 105                                | This work                                                             |
| NiCo <sub>2</sub> P <sub>x</sub>                           | 58                                 | <i>Adv. Mater.</i> <b>2017</b> , <i>29</i> , 1605502.                 |
| Ni <sub>0.89</sub> Co <sub>0.11</sub> Se <sub>2</sub>      | 85                                 | <i>Adv. Mater.</i> <b>2017</b> , <i>29</i> , 1606521.                 |
| NiP <sub>2</sub> NS/CC                                     | 102                                | <i>Nanoscale</i> <b>2014</b> , <i>6</i> , 13440–13445.                |
| CoMnP/Ni <sub>2</sub> P/NF                                 | 108                                | <i>J. Mater. Chem. A</i> <b>2021</b> , <i>9</i> , 22129–22139.        |
| NiMoN film                                                 | 109                                | <i>Adv. Energy Mater.</i> <b>2016</b> , <i>6</i> , 1600221.           |
| NiFeP/SG                                                   | 115                                | <i>Nano Energy</i> <b>2019</b> , <i>58</i> , 870–876.                 |
| ReS <sub>2</sub> /CFP                                      | 116                                | <i>Nano Energy</i> <b>2018</b> , <i>46</i> , 305–313.                 |
| Co <sub>4</sub> N-VN <sub>1-x</sub> O <sub>x</sub> /CC     | 118                                | <i>Appl. Catal. B-Environ.</i> <b>2018</b> , <i>241</i> , 521–527.    |
| NiCo <sub>2</sub> O <sub>4</sub> @CoMoO <sub>4</sub> /NF-7 | 121                                | <i>J. Mater. Chem. A</i> <b>2018</b> , <i>6</i> , 16950–16958.        |
| Co <sub>x</sub> Ni <sub>y</sub> P                          | 129                                | <i>Adv. Funct. Mater.</i> <b>2017</b> , <i>27</i> , 1703455.          |
| Ni <sub>2</sub> P                                          | 136                                | <i>Nano Res.</i> <b>2020</b> , <i>13</i> , 2098–2105.                 |
| FeNi-LDH/CoP/CC                                            | 138.6                              | <i>Angew. Chem.-Int. Edit.</i> <b>2019</b> , <i>58</i> , 11903–11909. |
| 3D-MoS <sub>2</sub> /G                                     | 143                                | <i>Nano Energy</i> <b>2019</b> , <i>61</i> , 611–616.                 |

|                                                               |     |                                                                   |
|---------------------------------------------------------------|-----|-------------------------------------------------------------------|
| FeCoNi                                                        | 149 | <i>ACS Catal.</i> <b>2017</b> , 7, 469–479.                       |
| NiCoFeP/C                                                     | 149 | <i>ChemComm</i> <b>2019</b> , 55, 10896–10899.                    |
| CoNiP@NF                                                      | 155 | <i>J. Mater. Chem. A</i> <b>2016</b> , 4, 10195–10202.            |
| (Ni <sub>0.33</sub> Co <sub>0.67</sub> )S <sub>2</sub> NWs/CC | 156 | <i>ACS Appl. Mater. Interfaces</i> <b>2018</b> , 10, 27723–27733. |
| Co <sub>2</sub> P/Co foil                                     | 157 | <i>J. Mater. Chem. A</i> <b>2017</b> , 5, 10561–10566.            |
| FeP <sub>2</sub> –NiP <sub>2</sub> @PC                        | 179 | <i>ACS Appl. Mater. Interfaces</i> <b>2020</b> , 12, 727–733.     |
| Co <sub>1</sub> Mn <sub>1</sub> CH/NF                         | 180 | <i>J. Am. Chem. Soc.</i> <b>2017</b> , 139, 8320–8328.            |
| Co <sub>x</sub> P/N-doped C                                   | 187 | <i>Carbon</i> <b>2019</b> , 145, 694–700.                         |
| CoP/Ni <sub>2</sub> P                                         | 200 | <i>RSC Adv.</i> <b>2021</b> , 11, 22467–22472.                    |
| Ni <sub>3</sub> Se <sub>2</sub>                               | 203 | <i>Nano Energy</i> <b>2016</b> , 24, 103–116.                     |
| Co <sub>2</sub> P/CoNPC                                       | 208 | <i>Adv. Mater.</i> <b>2020</b> , 32, 2003649.                     |
| CoP                                                           | 209 | <i>J. Am. Chem. Soc.</i> <b>2018</b> , 140, 2610–2618.            |
| CoNi <sub>2</sub> Se <sub>4</sub>                             | 220 | <i>ChemComm</i> <b>2017</b> , 53, 5412–5415.                      |
| bulk MoB                                                      | 225 | <i>Angew. Chem.-Int. Edit.</i> <b>2012</b> , 51, 12703–12706.     |
| FeCo/Co <sub>2</sub> P@NPCF                                   | 260 | <i>Adv. Energy Mater.</i> <b>2020</b> , 10, 1903854.              |
| Co <sub>2</sub> P@N, P-PCN                                    | 360 | <i>J. Mater. Chem. A</i> <b>2016</b> , 4, 15501–15510.            |
